# Supplementary material
Source: Royal Society of Chemistry journal article supplement (doi:10.1039/d5ta10204a)
Supplement: d5ta10204a1.pdf [file d5ta10204a1.pdf]

**Theoretical Insights into Encapsulation-Induced CO<sub>2</sub> reduction Selectivity  
Reversal on Ru Supported on TiO<sub>x</sub> Catalysts**

Yi Li<sup>1</sup>, Rong Wei<sup>1</sup>, Hongwei Tan<sup>1</sup>\*, Chang Yuan<sup>1</sup>\*, Xichen Li<sup>1</sup>, Guangju Chen<sup>1</sup>

*1. Key Laboratory of Theoretical and Computational Photochemistry, Ministry of Education,  
College of Chemistry, Beijing Normal University, Beijing 100875, China*

\* Authors to whom correspondence should be addressed.

E-mail address: [hongwei.tan@bnu.edu.cn](mailto:hongwei.tan@bnu.edu.cn) (Hongwei Tan)

[yuanchang@bnu.edu.cn](mailto:yuanchang@bnu.edu.cn) (Chang Yuan)

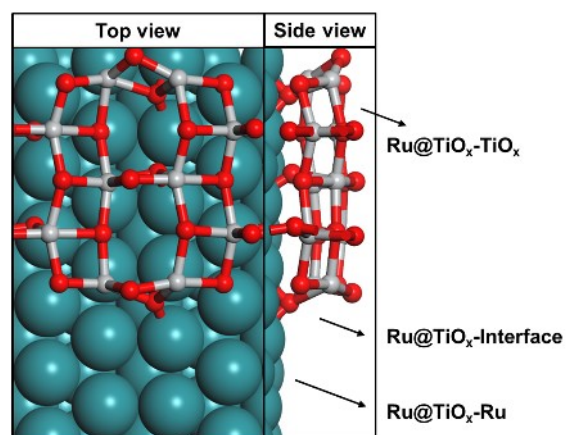

**Figure S1.** Optimized structure of Ru@TiO<sub>2</sub> catalyst. Ru: Green; Ti: Grey; O: Red.

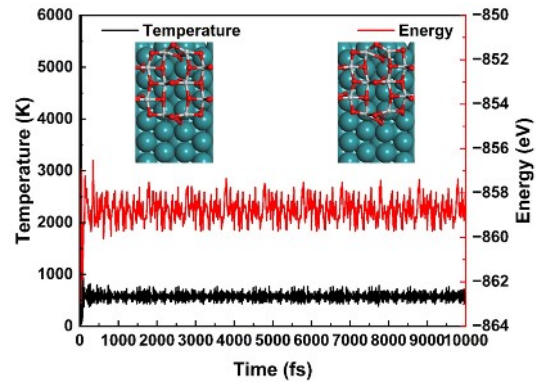

**Figure S2.** AIMD simulation result for Ru@TiO<sub>x</sub> under 573K.

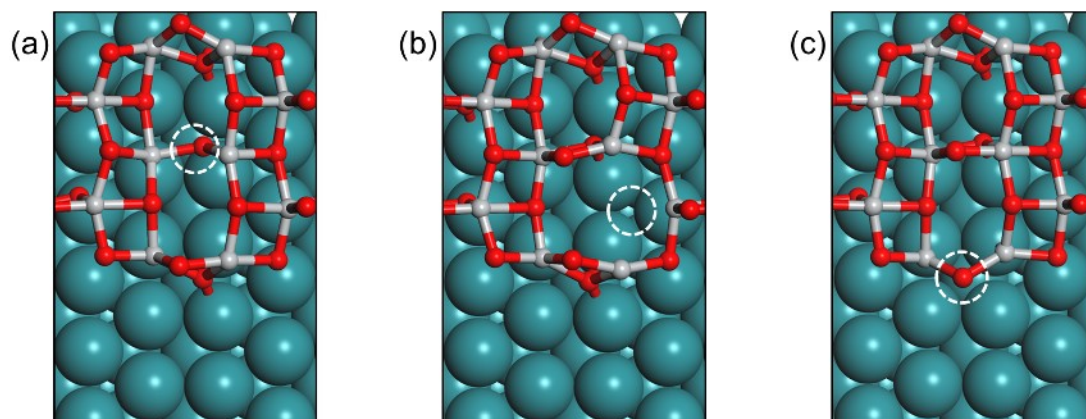

**Figure S3.** Optimized structures of (a) Ru@TiO<sub>2</sub>-Ov<sub>2c</sub>, (b) Ru@TiO<sub>2</sub>-Ov<sub>3c</sub>, and (c) the O<sub>2c</sub> site located near the interface.

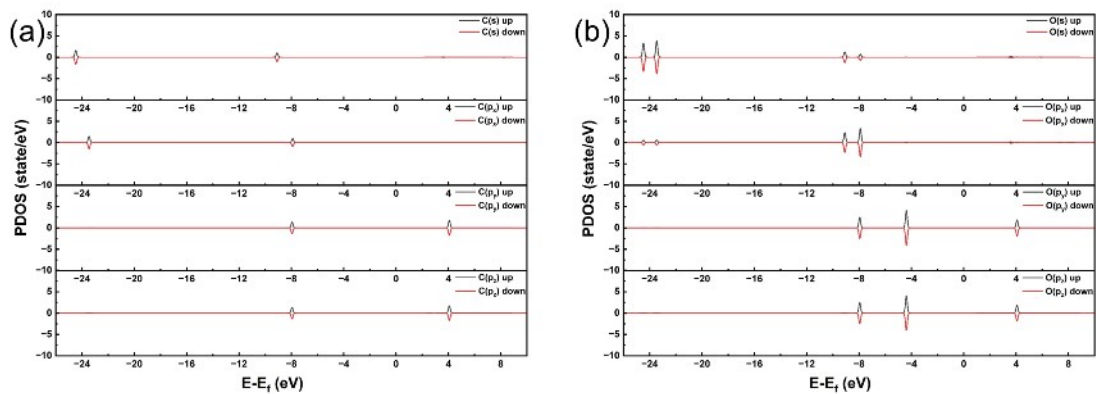

**Figure S4.** Projected density of states (PDOS) of the (a) C atom and (b) O atom in a free CO<sub>2</sub>.

The following information can be obtained from the figure: (1) The  $p_x$ ,  $p_y$ , and  $p_z$  orbitals of C, together with the  $s$ ,  $p_x$ ,  $p_y$ , and  $p_z$  orbitals of O, jointly contribute to the formation of the  $\pi$  orbital; (2) The  $p_y$  and  $p_z$  orbitals of O mainly form the lone pair orbital; (3) The  $p_y$  and  $p_z$  orbitals of C, along with the  $p_y$  and  $p_z$  orbitals of O, primarily contribute to the formation of the  $\pi^*$  orbital. Therefore, the energy region dominated solely by the carbon  $p_x$  orbital corresponds to the  $\pi$  orbital.

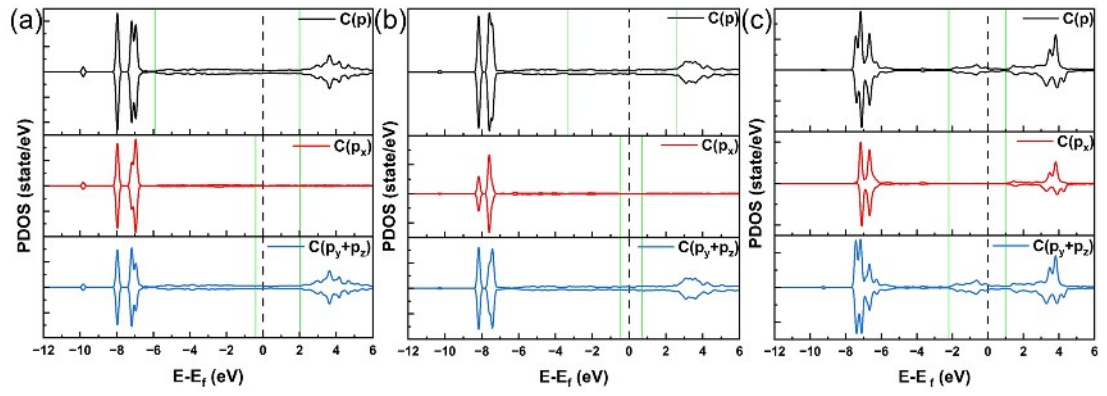

**Figure S5.** PDOS of C in CO<sub>2</sub> adsorbed on (a) Ru@TiO<sub>x</sub>-Ru, (b) Ru@TiO<sub>x</sub>-Interface, and (c) Ru@TiO<sub>x</sub>-TiO<sub>x</sub>.

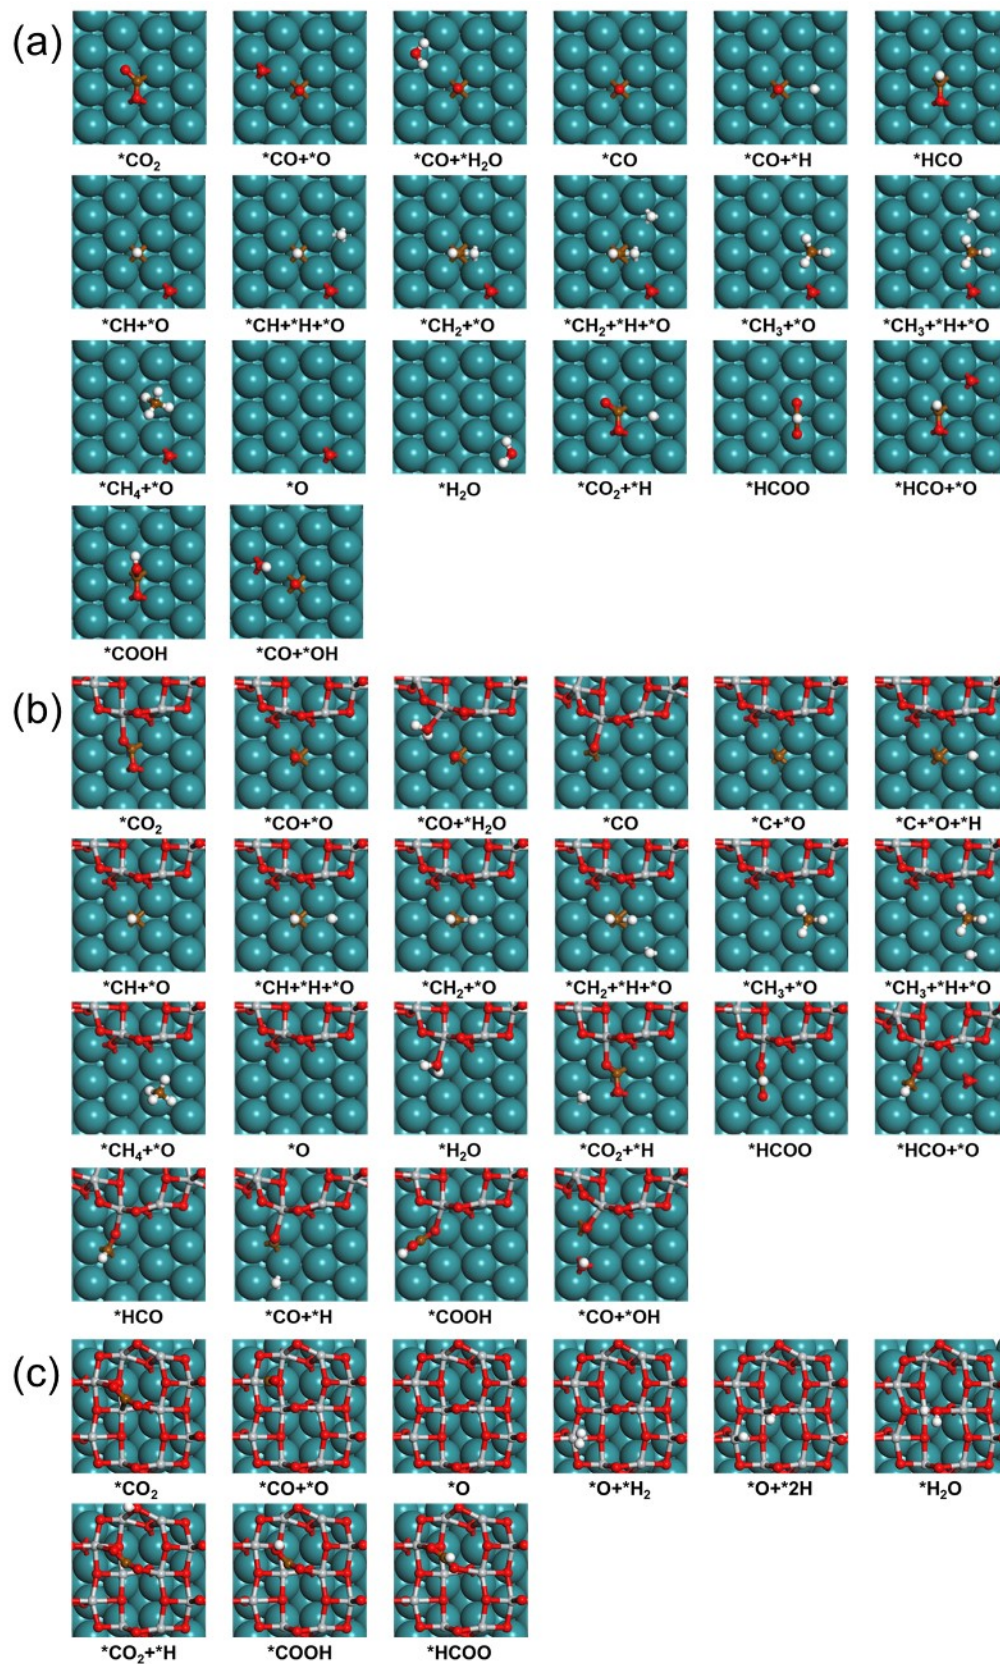

**Figure S6.** Optimized configurations of intermediates for CO<sub>2</sub> reduction on (a) Ru@TiO<sub>x</sub>-Ru, (b) Ru@TiO<sub>x</sub>-Interface, and (c) Ru@TiO<sub>x</sub>-TiO<sub>x</sub>. Ru: Green; Ti: Grey; O: Red; C: Brown; H: White.

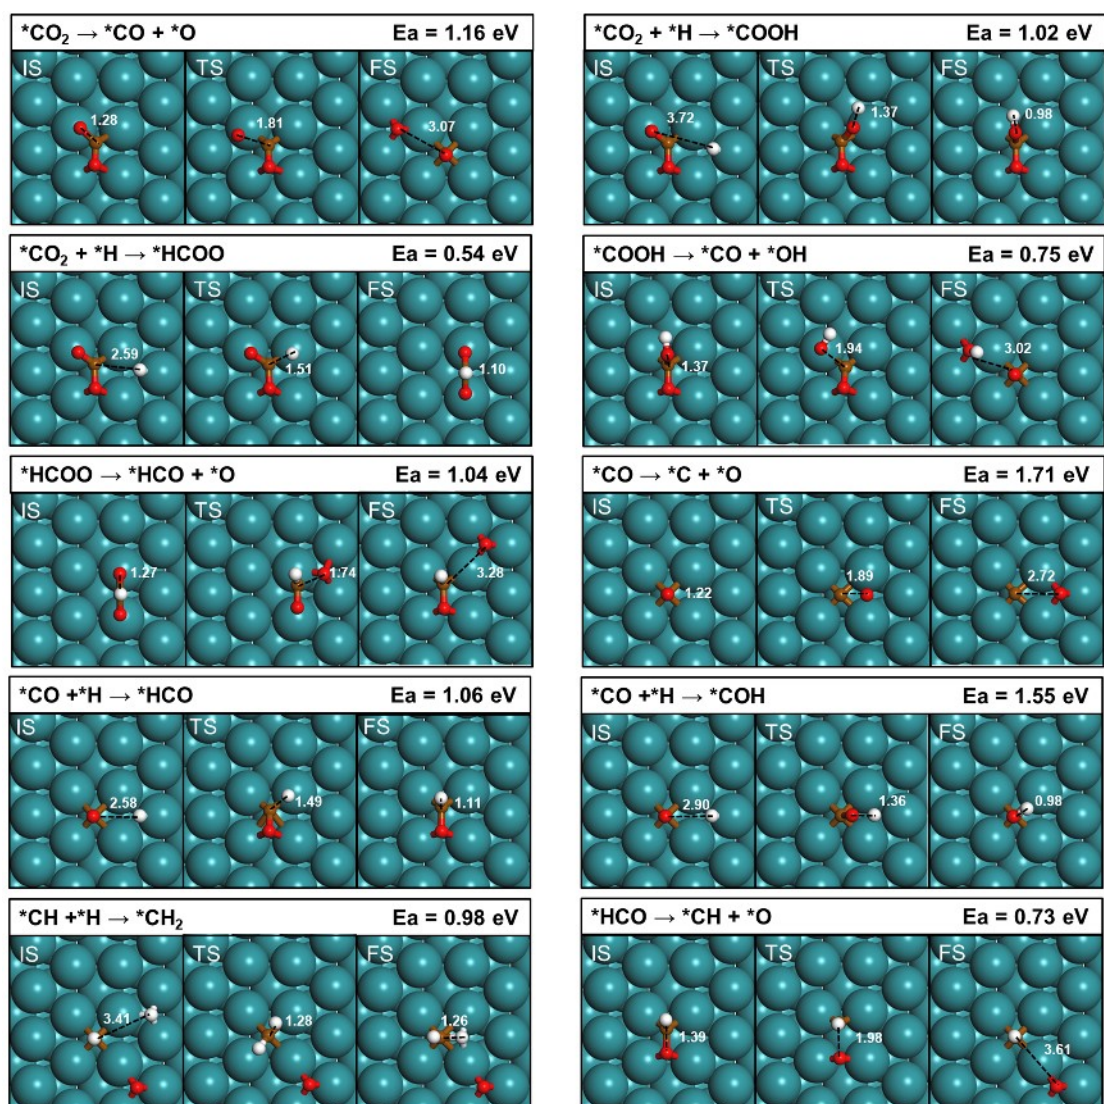

**Figure S7.** Structural evolution of key reaction steps on Ru@TiO<sub>x</sub>-Ru, including initial state (IS), transition state (TS), and final state (FS). Ru: Green; Ti: Grey; O: Red; C: Brown; H: White. The distance unit is Å.

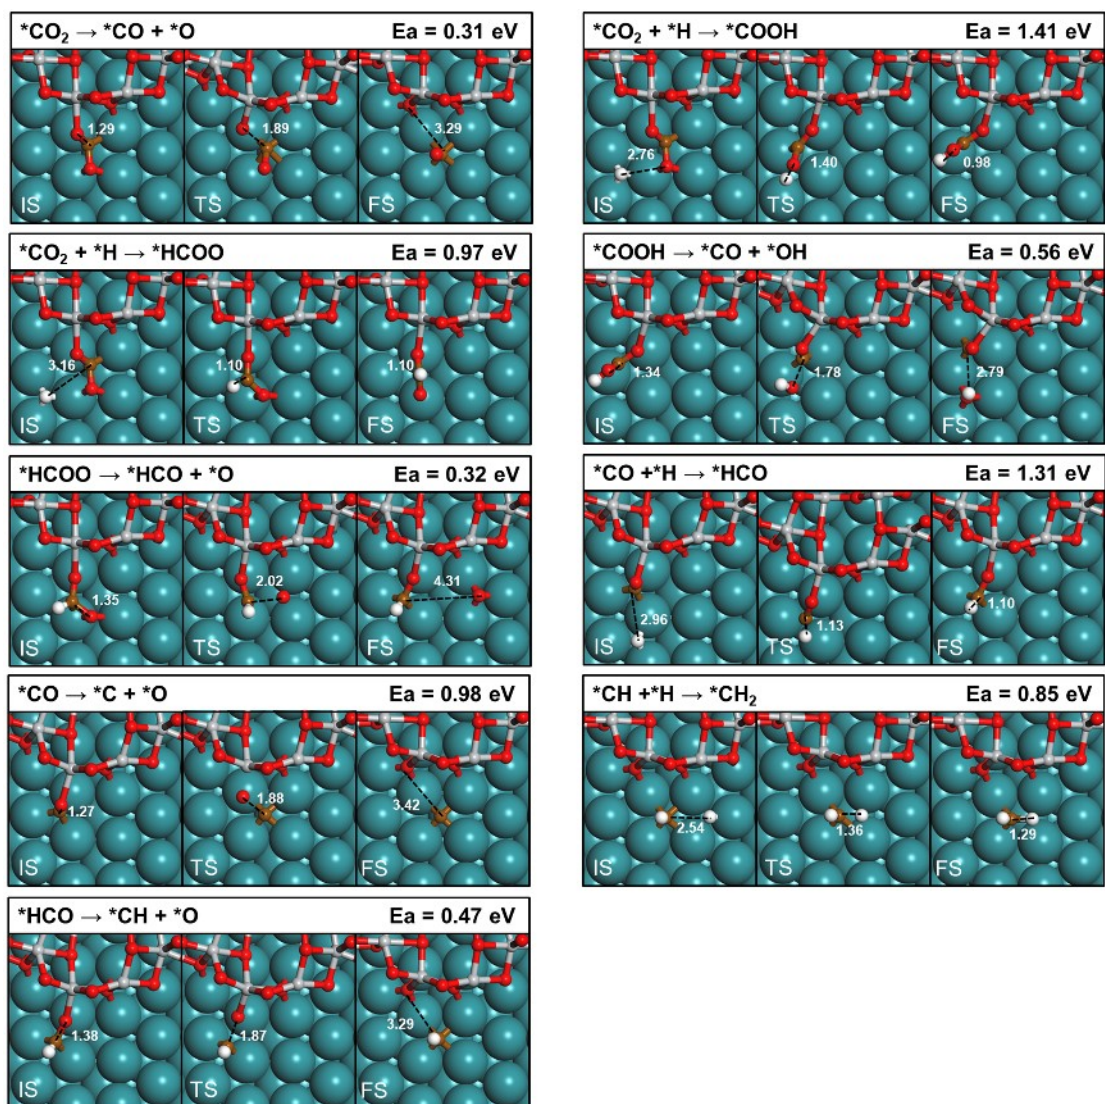

**Figure S8.** Structural evolution of key reaction steps on Ru@TiO<sub>x</sub>-Interface, including initial state (IS), transition state (TS), and final state (FS). Ru: Green; Ti: Grey; O: Red; C: Brown; H: White. The distance unit is Å.

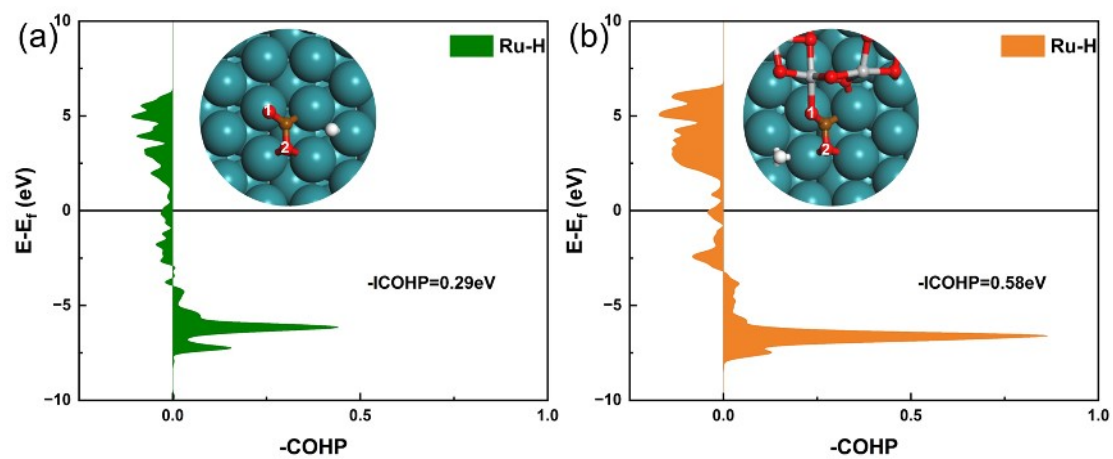

**Figure S9.** COHP analysis of Ru-H bond in (a) Ru@TiO<sub>x</sub>-Ru and (b) Ru@TiO<sub>x</sub>-Interface systems.

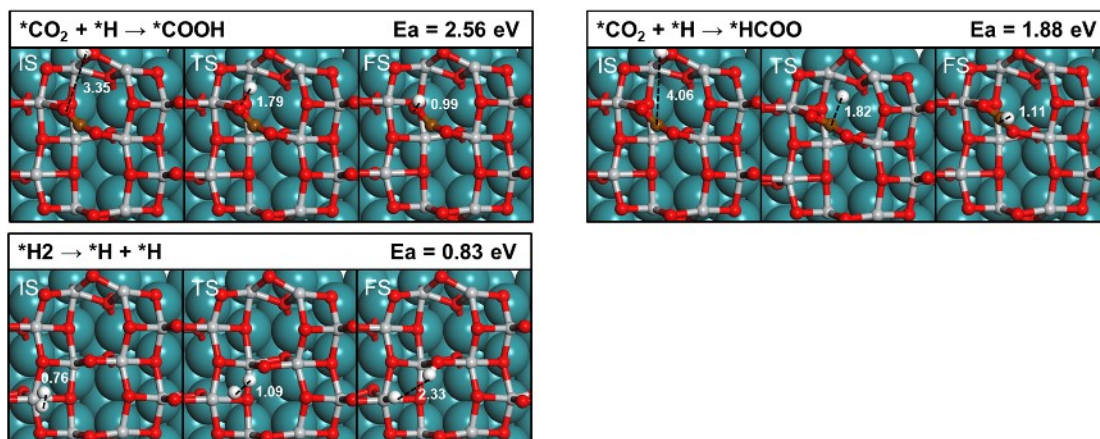

**Figure S10.** Structural evolution of key reaction steps on Ru@TiO<sub>x</sub>-TiO<sub>x</sub>, including initial state (IS), transition state (TS), and final state (FS). Ru: Green; Ti: Grey; O: Red; C: Brown; H: White.

The distance unit is Å.

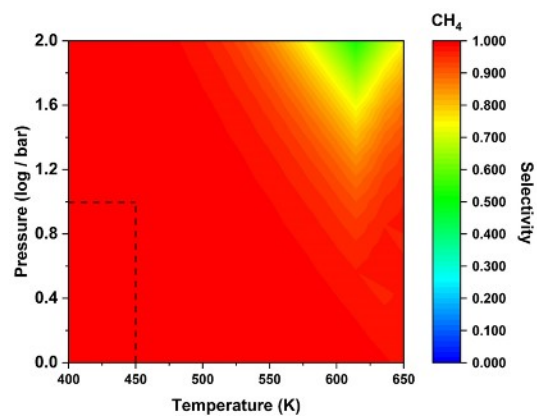

**Figure S11.** CH<sub>4</sub> selectivity on Ru@TiO<sub>x</sub>-Interface as a function of pressure (1–20 bar) and temperature (400–650 K).

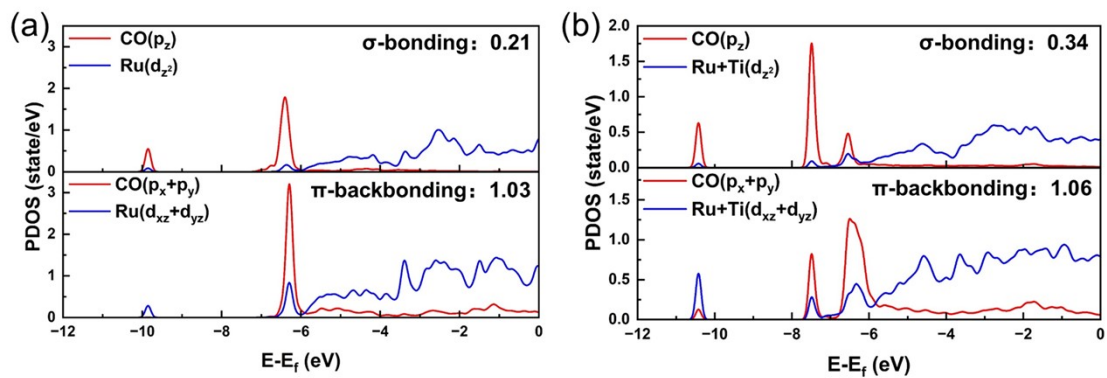

**Figure S12.** PDOS of CO<sub>2</sub> and Ru/Ti in (a) Ru@TiO<sub>x</sub>-Ru and (b) Ru@TiO<sub>x</sub>-Interface systems. The occupancies of  $\sigma$ -bonding and  $\pi$ -backbonding are presented at the upper right corner of each figure, which are obtained by integrating the overlapping peaks of the corresponding PDOS below the Fermi level.

**Table S1.** Formation Energies of Surface Oxygen Vacancies on TiO<sub>2</sub> in Different Catalysts.

|                                       | $E_f/eV$ |
|---------------------------------------|----------|
| p-TiO <sub>2</sub> -OV <sub>2c</sub>  | 4.84     |
| p-TiO <sub>2</sub> -OV <sub>3c</sub>  | 5.33     |
| Ru@TiO <sub>x</sub> -OV <sub>2c</sub> | 3.02     |
| Ru@TiO <sub>x</sub> -OV <sub>3c</sub> | 4.88     |

**Table S2.** Structural parameters for CO<sub>2</sub> adsorption on perfect TiO<sub>2</sub> and oxygen-deficient TiO<sub>x</sub>-Ov<sub>2c</sub> surfaces.

| Systems                            | $E_{\text{ads}}$ (eV) | $d_{\text{C-O1}}$ (Å) | $d_{\text{C-O2}}$ (Å) | $\angle\text{O-C-O}^\circ$ | $Q_{\text{CO}_2}$ (e) | $Q_{\text{C}}$ in CO <sub>2</sub> (e) | $Q_{\text{O1}}/Q_{\text{O2}}$ in CO <sub>2</sub> (e) |
|------------------------------------|-----------------------|-----------------------|-----------------------|----------------------------|-----------------------|---------------------------------------|------------------------------------------------------|
| TiO <sub>2</sub>                   | -0.23                 | 1.33                  | 1.21                  | 130.43                     | -0.02                 | +0.16                                 | -0.05/-0.13                                          |
| TiO <sub>x</sub> -Ov <sub>2c</sub> | -0.40                 | 1.24                  | 1.27                  | 135.11                     | -0.85                 | -0.69                                 | -0.05/-0.11                                          |

Positive and negative values indicate electron loss and gain by CO<sub>2</sub> upon adsorption, respectively.

**Table S3.** Free energy changes ( $\Delta G$ ) for each step of CO<sub>2</sub> reduction reaction on Ru@TiO<sub>x</sub>-Ru. \* denotes the adsorption site, and all energy values are in eV.

| Reaction steps                                                                                                                                | Ru@TiO <sub>x</sub> -Ru |
|-----------------------------------------------------------------------------------------------------------------------------------------------|-------------------------|
| * + CO <sub>2</sub> (g) + 4H <sub>2</sub> (g) ↔ *CO <sub>2</sub> + 4H <sub>2</sub> (g)                                                        | -0.17                   |
| *CO <sub>2</sub> + 4H <sub>2</sub> (g) ↔ *CO + *O + 4H <sub>2</sub> (g)                                                                       | -1.14                   |
| *CO + *O + 4H <sub>2</sub> (g) ↔ *CO + *H <sub>2</sub> O + 3H <sub>2</sub> (g)                                                                | 0.27                    |
| *CO + *H <sub>2</sub> O + 3H <sub>2</sub> (g) ↔ *CO + H <sub>2</sub> O(g) + 3H <sub>2</sub> (g)                                               | 0.16                    |
| *CO + H <sub>2</sub> O(g) + 3H <sub>2</sub> (g) ↔ *CO + *H + H <sub>2</sub> O(g) + 5/2H <sub>2</sub> (g)                                      | -0.32                   |
| *CO + *H + H <sub>2</sub> O(g) + 5/2H <sub>2</sub> (g) ↔ *HCO + H <sub>2</sub> O(g) + 5/2H <sub>2</sub> (g)                                   | 0.77                    |
| *HCO + H <sub>2</sub> O(g) + 5/2H <sub>2</sub> (g) ↔ *CH+*O + H <sub>2</sub> O(g) + 5/2H <sub>2</sub> (g)                                     | -1.20                   |
| *CH+*O + H <sub>2</sub> O(g) + 5/2H <sub>2</sub> (g) ↔ *CH+*H + *O + H <sub>2</sub> O(g) + 2H <sub>2</sub> (g)                                | -0.42                   |
| *CH+*H + *O + H <sub>2</sub> O(g) + 2H <sub>2</sub> (g) ↔ *CH <sub>2</sub> + *O + H <sub>2</sub> O(g) + 2H <sub>2</sub> (g)                   | 0.94                    |
| *CH <sub>2</sub> + *O + H <sub>2</sub> O(g) + 2H <sub>2</sub> (g) ↔ *CH <sub>2</sub> +*H + *O + H <sub>2</sub> O(g) + 3/2H <sub>2</sub> (g)   | -0.30                   |
| *CH <sub>2</sub> +*H + *O + H <sub>2</sub> O(g) + 3/2H <sub>2</sub> (g) ↔ *CH <sub>3</sub> + *O + H <sub>2</sub> O(g) + 3/2H <sub>2</sub> (g) | 0.43                    |
| *CH <sub>3</sub> + *O + H <sub>2</sub> O(g) + 3/2H <sub>2</sub> (g) ↔ *CH <sub>3</sub> +*H + *O + H <sub>2</sub> O(g) + H <sub>2</sub> (g)    | -0.28                   |
| *CH <sub>3</sub> +*H + *O + H <sub>2</sub> O(g) + H <sub>2</sub> (g) ↔ *CH <sub>4</sub> + *O + H <sub>2</sub> O(g) + H <sub>2</sub> (g)       | 0.07                    |
| *CH <sub>4</sub> + *O + H <sub>2</sub> O(g) + H <sub>2</sub> (g) ↔ * + CH <sub>4</sub> (g) + *O + H <sub>2</sub> O(g) + H <sub>2</sub> (g)    | -0.10                   |
| *O+H <sub>2</sub> (g) + H <sub>2</sub> O(g) + CH <sub>4</sub> (g) ↔ *H <sub>2</sub> O + H <sub>2</sub> O(g) + CH <sub>4</sub> (g)             | 0.63                    |
| *H <sub>2</sub> O + H <sub>2</sub> O(g) + CH <sub>4</sub> (g) ↔ * + 2H <sub>2</sub> O(g) + CH <sub>4</sub> (g)                                | -0.13                   |
| Formate Pathway:                                                                                                                              |                         |
| *CO <sub>2</sub> + 4H <sub>2</sub> (g) ↔ *CO <sub>2</sub> + *H + 7/2H <sub>2</sub> (g)                                                        | -0.34                   |
| *CO <sub>2</sub> + *H + 7/2H <sub>2</sub> (g) ↔ *HCOO + 7/2H <sub>2</sub> (g)                                                                 | 0.02                    |
| *HCOO + 7/2H <sub>2</sub> (g) ↔ *HCO + *O + 7/2H <sub>2</sub> (g)                                                                             | -0.47                   |
| *HCO + *O + 7/2H <sub>2</sub> (g) ↔ *HCO + H <sub>2</sub> O(g) + 5/2H <sub>2</sub> (g)                                                        | 0.52                    |
| Carboxyl Pathway:                                                                                                                             |                         |
| *CO <sub>2</sub> + *H + 7/2H <sub>2</sub> (g) ↔ *COOH + 7/2H <sub>2</sub> (g)                                                                 | 0.33                    |
| *COOH + 7/2H <sub>2</sub> (g) ↔ *CO + *OH + 7/2H <sub>2</sub> (g)                                                                             | -1.00                   |
| *CO + *OH + 7/2H <sub>2</sub> (g) ↔ *CO + H <sub>2</sub> O(g) + 3H <sub>2</sub> (g)                                                           | 0.29                    |
| The other competing pathways:                                                                                                                 |                         |
| *CO + H <sub>2</sub> O(g) + 3H <sub>2</sub> (g) ↔ * + CO(g) + H <sub>2</sub> O(g) + 3H <sub>2</sub> (g)                                       | 1.55                    |
| *CO + H <sub>2</sub> O(g) + 3H <sub>2</sub> (g) ↔ *C + *O + H <sub>2</sub> O(g) + 3H <sub>2</sub> (g)                                         | 0.06                    |
| *CO + *H + H <sub>2</sub> O(g) + 5/2H <sub>2</sub> (g) ↔ *COH + H <sub>2</sub> O(g) + 5/2H <sub>2</sub> (g)                                   | 0.63                    |
| *HCO+*H + H <sub>2</sub> O(g) + 2H <sub>2</sub> (g) ↔ *H <sub>2</sub> CO + H <sub>2</sub> O(g) + 2H <sub>2</sub> (g)                          | 0.43                    |
| *HCO+*H + H <sub>2</sub> O(g) + 2H <sub>2</sub> (g) ↔ *HCOH + H <sub>2</sub> O(g) + 2H <sub>2</sub> (g)                                       | 1.06                    |

**Table S4.** Free energy changes ( $\Delta G$ ) for each step of CO<sub>2</sub> reduction reaction on Ru@TiO<sub>x</sub>-Interface. \* denotes the adsorption site, and all energy values are in eV.

| Reaction steps                                                                                                                                 | Ru@TiO <sub>x</sub> -Interface |
|------------------------------------------------------------------------------------------------------------------------------------------------|--------------------------------|
| Direct Dissociation Pathway:                                                                                                                   |                                |
| * + CO <sub>2</sub> (g) + 4H <sub>2</sub> (g) ↔ *CO <sub>2</sub> + 4H <sub>2</sub> (g)                                                         | -0.42                          |
| *CO <sub>2</sub> + 4H <sub>2</sub> (g) ↔ *CO + *O + 4H <sub>2</sub> (g)                                                                        | -1.44                          |
| *CO + *O + 4H <sub>2</sub> (g) ↔ *CO + *H <sub>2</sub> O + 3H <sub>2</sub> (g)                                                                 | 0.78                           |
| *CO + *H <sub>2</sub> O + 3H <sub>2</sub> (g) ↔ *CO + H <sub>2</sub> O(g) + 3H <sub>2</sub> (g)                                                | -0.22                          |
| *CO + H <sub>2</sub> O(g) + 3H <sub>2</sub> (g) ↔ *C + *O + H <sub>2</sub> O(g) + 3H <sub>2</sub> (g)                                          | -0.30                          |
| *C + *O + H <sub>2</sub> O(g) + 3H <sub>2</sub> (g) ↔ *C + *O + *H + H <sub>2</sub> O(g) + 5/2H <sub>2</sub> (g)                               | -0.22                          |
| *C + *O + *H + H <sub>2</sub> O(g) + 5/2H <sub>2</sub> (g) ↔ *CH + *O + H <sub>2</sub> O(g) + 5/2H <sub>2</sub> (g)                            | -0.29                          |
| *CH + *O + H <sub>2</sub> O(g) + 5/2H <sub>2</sub> (g) ↔ *CH + *H + *O + H <sub>2</sub> O(g) + 2H <sub>2</sub> (g)                             | -0.23                          |
| *CH + *H + *O + H <sub>2</sub> O(g) + 2H <sub>2</sub> (g) ↔ *CH <sub>2</sub> + *O + H <sub>2</sub> O(g) + 2H <sub>2</sub> (g)                  | 0.87                           |
| *CH <sub>2</sub> + *O + H <sub>2</sub> O(g) + 2H <sub>2</sub> (g) ↔ *CH <sub>2</sub> + *H + *O + H <sub>2</sub> O(g) + 3/2H <sub>2</sub> (g)   | -0.22                          |
| *CH <sub>2</sub> + *H + *O + H <sub>2</sub> O(g) + 3/2H <sub>2</sub> (g) ↔ *CH <sub>3</sub> + *O + H <sub>2</sub> O(g) + 3/2H <sub>2</sub> (g) | 0.35                           |
| *CH <sub>3</sub> + *O + H <sub>2</sub> O(g) + 3/2H <sub>2</sub> (g) ↔ *CH <sub>3</sub> + *H + *O + H <sub>2</sub> O(g) + H <sub>2</sub> (g)    | 0.06                           |
| *CH <sub>3</sub> + *H + *O + H <sub>2</sub> O(g) + H <sub>2</sub> (g) ↔ *CH <sub>4</sub> + *O + H <sub>2</sub> O(g) + H <sub>2</sub> (g)       | -0.24                          |
| *CH <sub>4</sub> + *O + H <sub>2</sub> O(g) + H <sub>2</sub> (g) ↔ * + CH <sub>4</sub> (g) + *O + H <sub>2</sub> O(g) + H <sub>2</sub> (g)     | -0.02                          |
| *O + H <sub>2</sub> (g) + H <sub>2</sub> O(g) + CH <sub>4</sub> (g) ↔ *H <sub>2</sub> O + H <sub>2</sub> O(g) + CH <sub>4</sub> (g)            | 0.62                           |
| *H <sub>2</sub> O + H <sub>2</sub> O(g) + CH <sub>4</sub> (g) ↔ * + 2H <sub>2</sub> O(g) + CH <sub>4</sub> (g)                                 | 0.29                           |
| Formate Pathway:                                                                                                                               |                                |
| *CO <sub>2</sub> + 4H <sub>2</sub> (g) ↔ *CO <sub>2</sub> + *H + 7/2H <sub>2</sub> (g)                                                         | -0.49                          |
| *CO <sub>2</sub> + *H + 7/2H <sub>2</sub> (g) ↔ *HCOO + 7/2H <sub>2</sub> (g)                                                                  | 0.46                           |
| *HCOO + 7/2H <sub>2</sub> (g) ↔ *HCO + *O + 7/2H <sub>2</sub> (g)                                                                              | -0.67                          |
| *HCO + *O + 7/2H <sub>2</sub> (g) ↔ *HCO + H <sub>2</sub> O(g) + 5/2H <sub>2</sub> (g)                                                         | 0.52                           |
| *HCO + H <sub>2</sub> O(g) + 5/2H <sub>2</sub> (g) ↔ *CH + *O + H <sub>2</sub> O(g) + 5/2H <sub>2</sub> (g)                                    | -1.52                          |
| Carboxyl Pathway:                                                                                                                              |                                |
| *CO <sub>2</sub> + *H + 7/2H <sub>2</sub> (g) ↔ *COOH + 7/2H <sub>2</sub> (g)                                                                  | 0.65                           |
| *COOH + 7/2H <sub>2</sub> (g) ↔ *CO + *OH + 7/2H <sub>2</sub> (g)                                                                              | -1.17                          |
| *CO + *OH + 7/2H <sub>2</sub> (g) ↔ *CO + H <sub>2</sub> O(g) + 3H <sub>2</sub> (g)                                                            | 0.12                           |
| The other competing pathways:                                                                                                                  |                                |
| *CO + H <sub>2</sub> O(g) + 3H <sub>2</sub> (g) ↔ * + CO(g) + H <sub>2</sub> O(g) + 3H <sub>2</sub> (g)                                        | 1.98                           |
| *CO + *H + H <sub>2</sub> O(g) + 5/2H <sub>2</sub> (g) ↔ *COH + H <sub>2</sub> O(g) + 5/2H <sub>2</sub> (g)                                    | 1.21                           |
| *HCO + *H + H <sub>2</sub> O(g) + 2H <sub>2</sub> (g) ↔ *H <sub>2</sub> CO + H <sub>2</sub> O(g) + 2H <sub>2</sub> (g)                         | 0.29                           |
| *HCO + *H + H <sub>2</sub> O(g) + 2H <sub>2</sub> (g) ↔ *HCOH + H <sub>2</sub> O(g) + 2H <sub>2</sub> (g)                                      | 0.97                           |

**Table S5.** Free energy changes ( $\Delta G$ ) for each step of CO<sub>2</sub> reduction reaction on Ru@TiO<sub>x</sub>-TiO<sub>x</sub>. \* denotes the adsorption site, and all energy values are in eV.

| Reaction steps                                                                       | Ru@TiO <sub>x</sub> -TiO <sub>x</sub> |
|--------------------------------------------------------------------------------------|---------------------------------------|
| Direct Dissociation Pathway:                                                         |                                       |
| * + CO <sub>2</sub> (g) + H <sub>2</sub> (g) ↔ *CO <sub>2</sub> + H <sub>2</sub> (g) | 0.29                                  |
| *CO <sub>2</sub> + H <sub>2</sub> (g) ↔ *CO + *O + H <sub>2</sub> (g)                | 0.05                                  |
| *CO + *O + H <sub>2</sub> (g) ↔ *O + CO(g) + H <sub>2</sub> (g)                      | -0.12                                 |
| *O + CO(g) + H <sub>2</sub> (g) ↔ *O + *H <sub>2</sub> + CO(g)                       | 0.29                                  |
| *O + *H <sub>2</sub> + CO(g) ↔ *O + *2H + CO(g)                                      | 0.67                                  |
| *O + *2H + CO(g) ↔ *H <sub>2</sub> O + CO(g)                                         | -1.00                                 |
| *H <sub>2</sub> O + CO(g) ↔ CO(g) + H <sub>2</sub> O(g)                              | 0.46                                  |
| Formate Pathway:                                                                     |                                       |
| *CO <sub>2</sub> + *H + 1/2H <sub>2</sub> ↔ *HCOO                                    | -0.92                                 |
| Carboxyl Pathway:                                                                    |                                       |
| *CO <sub>2</sub> + *H + 1/2H <sub>2</sub> ↔ *COOH                                    | 0.79                                  |
| The other competing pathways:                                                        |                                       |
| *CO + *O + H <sub>2</sub> (g) ↔ *C + *O + *O + H <sub>2</sub> (g)                    | 6.00                                  |
| *CO + *H + 1/2H <sub>2</sub> (g) ↔ *HCO + 1/2H <sub>2</sub> (g)                      | 0.99                                  |
| *CO + *H + 1/2H <sub>2</sub> (g) ↔ *COH + 1/2H <sub>2</sub> (g)                      | 2.81                                  |

**Table S6.** Adsorption energies of oxygen-containing intermediates in the Ru@TiO<sub>x</sub>-Ru and Ru@TiO<sub>x</sub>-Interface systems, and all energy values are in eV.

| adsorbates        | Ru@TiO <sub>x</sub> -Ru | Ru@TiO <sub>x</sub> -Interface |
|-------------------|-------------------------|--------------------------------|
| O                 | -6.42                   | -6.83                          |
| CO <sub>2</sub>   | -0.78                   | -1.06                          |
| HCO               | -3.42                   | -3.59                          |
| COH               | -5.29                   | -5.33                          |
| H <sub>2</sub> CO | -2.01                   | -2.27                          |
| HCOH              | -4.53                   | -4.79                          |
| HCOO              | -3.85                   | -3.86                          |
| COOH              | -3.21                   | -3.33                          |

**Table S7.** Definitions of the symbols used in the free-energy profiles of Ru@TiO<sub>x</sub>-Ru, Ru@TiO<sub>x</sub>-Interface, and Ru@TiO<sub>x</sub>-TiO<sub>x</sub>.

|                                 |                                                                         |
|---------------------------------|-------------------------------------------------------------------------|
| Ru@TiO <sub>x</sub> -Ru:        |                                                                         |
| CO <sub>2</sub> (g)             | * + CO <sub>2</sub> (g) + 4H <sub>2</sub> (g)                           |
| *CO <sub>2</sub>                | *CO <sub>2</sub> + 4H <sub>2</sub> (g)                                  |
| *CO + *O                        | *CO + *O + 4H <sub>2</sub> (g)                                          |
| *CO + *H <sub>2</sub> O         | *CO + *H <sub>2</sub> O + 3H <sub>2</sub> (g)                           |
| *CO                             | *CO + H <sub>2</sub> O(g) + 3H <sub>2</sub> (g)                         |
| *CO + *H                        | *CO + *H + H <sub>2</sub> O(g) + 5/2H <sub>2</sub> (g)                  |
| *HCO                            | *HCO + H <sub>2</sub> O(g) + 5/2H <sub>2</sub> (g)                      |
| *CH+*O                          | *CH + *O + H <sub>2</sub> O(g) + 5/2H <sub>2</sub> (g)                  |
| *CH+*H + *O                     | *CH + *H + *O + H <sub>2</sub> O(g) + 2H <sub>2</sub> (g)               |
| *CH <sub>2</sub> + *O           | *CH <sub>2</sub> + *O + H <sub>2</sub> O(g) + 2H <sub>2</sub> (g)       |
| *CH <sub>2</sub> +*H + *O       | *CH <sub>2</sub> +*H + *O + H <sub>2</sub> O(g) + 3/2H <sub>2</sub> (g) |
| *CH <sub>3</sub> + *O           | *CH <sub>3</sub> + *O + H <sub>2</sub> O(g) + 3/2H <sub>2</sub> (g)     |
| *CH <sub>3</sub> +*H + *O       | *CH <sub>3</sub> +*H + *O + H <sub>2</sub> O(g) + H <sub>2</sub> (g)    |
| *CH <sub>4</sub> + *O           | *CH <sub>4</sub> + *O + H <sub>2</sub> O(g) + H <sub>2</sub> (g)        |
| *O                              | *O + CH <sub>4</sub> (g) + H <sub>2</sub> O(g) + H <sub>2</sub> (g)     |
| *H <sub>2</sub> O               | *H <sub>2</sub> O + H <sub>2</sub> O(g) + CH <sub>4</sub> (g)           |
| *                               | * + 2H <sub>2</sub> O(g) + CH <sub>4</sub> (g)                          |
| *CO <sub>2</sub> + *H           | *CO <sub>2</sub> + *H + 7/2H <sub>2</sub> (g)                           |
| *HCOO                           | *HCOO + 7/2H <sub>2</sub> (g)                                           |
| *HCO + *O                       | *HCO + *O + 7/2H <sub>2</sub> (g)                                       |
| *HCO                            | *HCO + H <sub>2</sub> O(g) + 5/2H <sub>2</sub> (g)                      |
| *COOH                           | *COOH + 7/2H <sub>2</sub> (g)                                           |
| *CO + *OH                       | *CO + *OH + 7/2H <sub>2</sub> (g)                                       |
| CO(g)                           | * + CO(g) + H <sub>2</sub> O(g) + 3H <sub>2</sub> (g)                   |
| *C + *O                         | *C + *O + H <sub>2</sub> O(g) + 3H <sub>2</sub> (g)                     |
| *COH                            | *COH + H <sub>2</sub> O(g) + 5/2H <sub>2</sub> (g)                      |
| *H <sub>2</sub> CO              | *H <sub>2</sub> CO + H <sub>2</sub> O(g) + 2H <sub>2</sub> (g)          |
| *HCOH                           | *HCOH + H <sub>2</sub> O(g) + 2H <sub>2</sub> (g)                       |
| Ru@TiO <sub>x</sub> -Interface: |                                                                         |
| CO <sub>2</sub> (g)             | * + CO <sub>2</sub> (g) + 4H <sub>2</sub> (g)                           |
| *CO <sub>2</sub>                | *CO <sub>2</sub> + 4H <sub>2</sub> (g)                                  |
| *CO + *O                        | *CO + *O + 4H <sub>2</sub> (g)                                          |
| *CO + *H <sub>2</sub> O         | *CO + *H <sub>2</sub> O + 3H <sub>2</sub> (g)                           |
| *CO                             | *CO + H <sub>2</sub> O(g) + 3H <sub>2</sub> (g)                         |
| *C + *O                         | *C + *O + H <sub>2</sub> O(g) + 3H <sub>2</sub> (g)                     |
| *C + *H + *O                    | *C + *O + *H + H <sub>2</sub> O(g) + 5/2H <sub>2</sub> (g)              |
| *CH + *O                        | *CH + *O + H <sub>2</sub> O(g) + 5/2H <sub>2</sub> (g)                  |
| *CH + *H + *O                   | *CH + *H + *O + H <sub>2</sub> O(g) + 2H <sub>2</sub> (g)               |

|                                         |                                         |
|-----------------------------------------|-----------------------------------------|
| $*CH_2 + *O$                            | $*CH_2 + *O + H_2O(g) + 2H_2(g)$        |
| $*CH_2 + *H + *O$                       | $*CH_2 + *H + *O + H_2O(g) + 3/2H_2(g)$ |
| $*CH_3 + *O$                            | $*CH_3 + *O + H_2O(g) + 3/2H_2(g)$      |
| $*CH_3 + *H + *O$                       | $*CH_3 + *H + *O + H_2O(g) + H_2(g)$    |
| $*CH_4 + *O$                            | $*CH_4 + *O + H_2O(g) + H_2(g)$         |
| $*O$                                    | $*O + CH_4(g) + H_2O(g) + H_2(g)$       |
| $*H_2O$                                 | $*H_2O + H_2O(g) + CH_4(g)$             |
| $*$                                     | $* + 2H_2O(g) + CH_4(g)$                |
| $*CO_2 + *H$                            | $*CO_2 + *H + 7/2H_2(g)$                |
| $*HCOO$                                 | $*HCOO + 7/2H_2(g)$                     |
| $*HCO + *O$                             | $*HCO + *O + 7/2H_2(g)$                 |
| $*HCO$                                  | $*HCO + H_2O(g) + 5/2H_2(g)$            |
| $*COOH$                                 | $*COOH + 7/2H_2(g)$                     |
| $*CO + *OH$                             | $*CO + *OH + 7/2H_2(g)$                 |
| $CO(g)$                                 | $* + CO(g) + H_2O(g) + 3H_2(g)$         |
| $*COH$                                  | $*COH + H_2O(g) + 5/2H_2(g)$            |
| $*H_2CO$                                | $*H_2CO + H_2O(g) + 2H_2(g)$            |
| $*HCOH$                                 | $*HCOH + H_2O(g) + 2H_2(g)$             |
| Ru@TiO <sub>x</sub> -TiO <sub>x</sub> : |                                         |
| $CO_2(g)$                               | $* + CO_2(g) + H_2(g)$                  |
| $*CO_2$                                 | $*CO_2 + H_2(g)$                        |
| $*CO + *O$                              | $*CO + *O + H_2(g)$                     |
| $*O$                                    | $*O + CO(g) + H_2(g)$                   |
| $*O + *H_2$                             | $*O + *H_2 + CO(g)$                     |
| $*O + *2H$                              | $*O + *2H + CO(g)$                      |
| $*H_2O$                                 | $*H_2O + CO(g)$                         |
| $*$                                     | $* + CO(g) + H_2O(g)$                   |
| $*CO_2 + *H$                            | $*CO_2 + *H + 1/2H_2$                   |
| $*HCOO$                                 | $*HCOO + 1/2H_2$                        |
| $*COOH$                                 | $*COOH + 1/2H_2$                        |
| $*C + *O + *O$                          | $*C + *O + *O + H_2(g)$                 |
| $*HCO$                                  | $*HCO + 1/2H_2(g)$                      |
| $*COH$                                  | $*COH + 1/2H_2(g)$                      |
